# Supplementary material
Source: PubMed Central journal article supplement (PMC108452)
Supplement: nar_28_16_3134__1.pdf [file nar_28_16_3134__1.pdf]

**SUPPLEMENTARY MATERIAL**

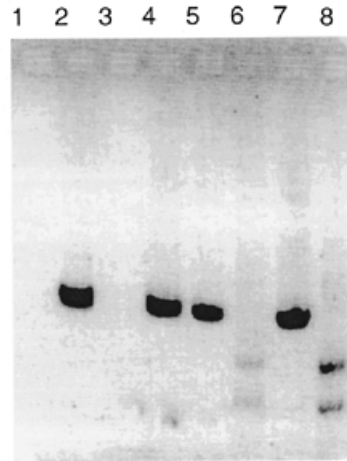

**Figure S1.** Analysis of genomic DNA of the rat hepatocarcinoma cell line LFCL11. Polymerase chain reaction was performed with primers described in Materials and Methods and with genomic DNA of LFCL11 cells (lanes 1, 2, 5 and 6) and of parental LFCL2A cells (lane 3). As control of amplified fragment, PCR was performed on pIGF-1711b/luc (lanes 4, 7 and 8). PCR fragment (2150 bp) obtained from amplification of LFCL11 genomic DNA (lane 6) and of pIGF-1711b/luc (lane 8) was digested with *SacI*. Lane 1 represents the amplification of LFCL11 genomic DNA with only the forward primer (GL1 primer). From PCR results, it was concluded that the pIGF-1711b/luc plasmid was entirely (promoter, 5'UTR of IGF-I and luc cDNA) integrated in rat chromosomes.
